# Supplementary material for: Structures of β-klotho reveal a 'zip code'-like mechanism for endocrine FGF signalling.
Source: Springer Nature journal article supplement (doi:10.1038/nature25010), 2018-01-25
Supplement: 41586_2018_BFnature25010_MOESM1_ESM.pdf [file 41586_2018_BFnature25010_MOESM1_ESM.pdf]

## Supplementary Discussion

### **$\beta$ -Klotho binding energy is distributed along the length of FGF21<sub>CT</sub>.**

The affinity of FGF21 for sKLB was measured using MicroScale Thermophoresis (MST)<sup>1</sup>, where the thermophoretic movement of fluorescently-labeled FGF21 (fl-FGF21) in solution is monitored upon sKLB binding. Fitting the normalized fluorescence intensities yields a dissociation constant ( $K_D$ ) of 43.5 nM for FGF21 binding to sKLB (Extended Data Fig. 6a). This value agrees with measurements using SPR<sup>2</sup>, and confirms earlier reports that FGF21 binds  $\beta$ -Klotho with high affinity in the absence of FGFR<sup>3</sup>. To measure binding of FGF21<sub>CT</sub> to sKLB, an MST-based competition assay was used, in which GST-fused FGF21<sub>CT</sub> (GST-FGF21<sub>CT</sub>) was titrated into a constant sKLB/fl-FGF21 mixture (Extended Data Fig. 6c). Fitting of the thermophoresis changes arising from competition by GST-FGF21<sub>CT</sub> using the Hill equation yields an  $IC_{50}$  value of 704 nM, confirming that the C-terminal region of FGF21 is primarily responsible for the high-affinity binding of the ligand to sKLB. We also measured the binding affinities of other interactions essential for FGF21-induced stimulation of FGFR1c. MST data obtained using fluorescently labeled, extracellular ligand-binding region of FGFR1c (FGFR1<sub>CD2D3</sub>) revealed that sKLB binds FGFR1<sub>CD2D3</sub> with a  $K_D$  value of approximately 1  $\mu$ M (Extended Data Fig. 6b). By contrast, FGF21 binding to FGFR1<sub>CD2D3</sub> is too weak for precise  $K_D$  determination using MST ( $K_D > 10$ -100  $\mu$ M) even though the canonical FGF1 binds to the same FGFR1<sub>CD2D3</sub> protein with  $K_D$  of around 1  $\mu$ M<sup>4,5</sup>. These results are consistent with the failure of even very high FGF21 concentrations to activate cells expressing FGFR1c alone (Extended Data Fig. 7).

To determine whether binding of FGF21<sub>CT</sub> to sKLB is dominated by either the multi-turn element that docks on site 1 (D1) or the pseudosubstrate that binds to site 2 (D2), we generated mutations in both regions and assessed their effects on GST-FGF21<sub>CT</sub> binding to sKLB in the MST-based competition assay described above. First, we tested mutations expected to destabilize the internal structure of the multi-turn element in FGF21<sub>CT</sub> (Fig. 2e), specifically D192A and P193A mutations that will disrupt intramolecular hydrogen bonds that stabilize the D192-P193-L194-S195  $\beta$ -turn. As anticipated,  $IC_{50}$  values measured for D192A or P193A-mutated GST-

FGF21<sub>CT</sub> variants were 10 to 20-fold higher than those for wild-type (Extended Data Fig. 6c). Second, we tested mutations that should disrupt central intermolecular interactions between the S-P-S pseudosubstrate region of FGF21<sub>CT</sub> and site 2 (D2) of  $\beta$ -Klotho. As shown in Extended Data Fig. 6d, replacing S204, S206 or Y207 in GST-FGF21<sub>CT</sub> with alanines causes an 8 to 10-fold increase in IC<sub>50</sub>.

These data argue that binding of FGF21<sub>CT</sub> to  $\beta$ -Klotho involves both elements in FGF21<sub>CT</sub>, and is mediated by their cooperative binding to both site 1 and site 2 in  $\beta$ -Klotho. Moreover, the results argue that both site 1 and site 2 must be occupied in order to maintain stable interactions between FGF21<sub>CT</sub> and  $\beta$ -Klotho. This conclusion, also clearly suggested by the crystal structure, is consistent with several previous results. For example, earlier studies using  $\alpha$ -Klotho/ $\beta$ -Klotho chimeras showed that FGF21 binding requires that both D1 and D2 are from  $\beta$ -Klotho<sup>6</sup>. Similarly, proteolytic cleavage or truncation that removes the 10 C-terminal amino acids from FGF21 (which bind D2) leads to its inactivation *in vivo* and in cellular studies<sup>2,7,8</sup>. In parallel, we found using SPR and/or MST that loss of the 10 C-terminal amino acids from FGF21 abolishes its binding to  $\beta$ -Klotho, and that loss of D2 from  $\beta$ -Klotho abolishes its binding to wild-type FGF21 (data not shown). Thus, FGF21 binding to neither site 1 nor site 2 alone is sufficient for stable binding to  $\beta$ -Klotho, arguing that FGF21/ $\beta$ -Klotho complex formation is mediated by cooperation of multiple weak binding events, primarily to site 1 and site 2.

### **Mutating $\beta$ -Klotho's FGF21-binding-interface impairs receptor activation but not Klotho/FGFR1 interactions.**

We next investigated the effects of mutations in  $\beta$ -Klotho's two FGF21<sub>CT</sub>-binding sites on the ability of FGF21 to stimulate FGFR1 activation in transfected L6 myoblasts (Extended Data Fig. 6e-g). L6 cells lack endogenous FGFRs and  $\beta$ -Klotho, but were engineered to express ectopically either human FGFR1c or  $\beta$ -Klotho alone, or to co-express FGFR1c and  $\beta$ -Klotho at matched levels. As expected, FGF21 only stimulates FGFR1c tyrosine phosphorylation in cells that co-express FGFR1c and  $\beta$ -Klotho (Extended Data Fig. 7), whereas FGF1 activates FGFR1c to similar levels regardless of  $\beta$ -Klotho's presence. Three independent mutations in site 1 on D1, replacing V392, T431, and M435 individually with their corresponding residues in  $\alpha$ -Klotho (which does not bind FGF21), caused a substantial decrease in FGF21 stimulation of FGFR1c tyrosine phosphorylation (Extended Data Fig. 6f). Similarly, mutating key amino acids in the

pseudo-substrate binding site of D2 or site 2 (Y643, H646, E693, R696, R829 or R845) almost completely abolished FGF21-induced stimulation of FGFR1c, while leaving FGF1-induced stimulation of the receptor unaffected in the same cells (Extended Data Fig. 6g). Mutating F849, by contrast, which abuts the linker between the two parts of the FGF21<sub>CT</sub> ligand (Extended Data Fig. 6e), had relatively little effect (Extended Data Fig. 6g) on FGF21-induced receptor activation, consistent with the bipartite nature of the interface discussed above. Importantly in this analysis, we found that the  $\beta$ -Klotho mutations did not affect interactions between FGFR1c and  $\beta$ -Klotho as assessed by their levels in anti-FGFR1c immunoprecipitates (Extended Data Fig. 6f-g), arguing that FGF21 must activate a pre-existing FGFR1c/ $\beta$ -Klotho complex.

## Supplementary References

- 1 Seidel, S. A. *et al.* Microscale thermophoresis quantifies biomolecular interactions under previously challenging conditions. *Methods* **59**, 301-315, doi:10.1016/j.ymeth.2012.12.005 (2013).
- 2 Yie, J. *et al.* FGF21 N- and C-termini play different roles in receptor interaction and activation. *FEBS Lett* **583**, 19-24, doi:10.1016/j.febslet.2008.11.023 (2009).
- 3 Goetz, R. *et al.* Klotho coreceptors inhibit signaling by paracrine fibroblast growth factor 8 subfamily ligands. *Mol Cell Biol* **32**, 1944-1954, doi:10.1128/MCB.06603-11 (2012).
- 4 Spivak-Kroizman, T. *et al.* Heparin-induced oligomerization of FGF molecules is responsible for FGF receptor dimerization, activation, and cell proliferation. *Cell* **79**, 1015-1024 (1994).
- 5 Olsen, S. K. *et al.* Insights into the molecular basis for fibroblast growth factor receptor autoinhibition and ligand-binding promiscuity. *Proc Natl Acad Sci U S A* **101**, 935-940, doi:10.1073/pnas.0307287101 (2004).
- 6 Wu, X. *et al.* C-terminal tail of FGF19 determines its specificity toward Klotho co-receptors. *J Biol Chem* **283**, 33304-33309, doi:10.1074/jbc.M803319200 (2008).
- 7 Micanovic, R. *et al.* Different roles of N- and C- termini in the functional activity of FGF21. *J Cell Physiol* **219**, 227-234, doi:10.1002/jcp.21675 (2009).
- 8 Hecht, R. *et al.* Rationale-Based Engineering of a Potent Long-Acting FGF21 Analog for the Treatment of Type 2 Diabetes. *PLoS One* **7**, e49345, doi:10.1371/journal.pone.0049345 (2012).

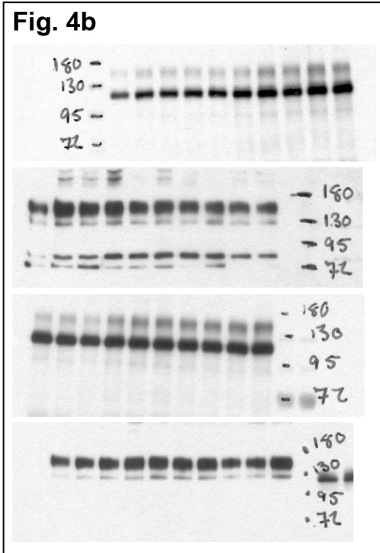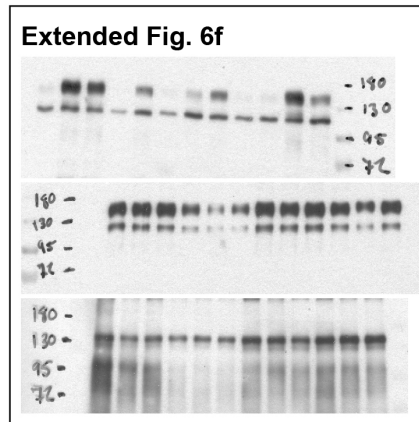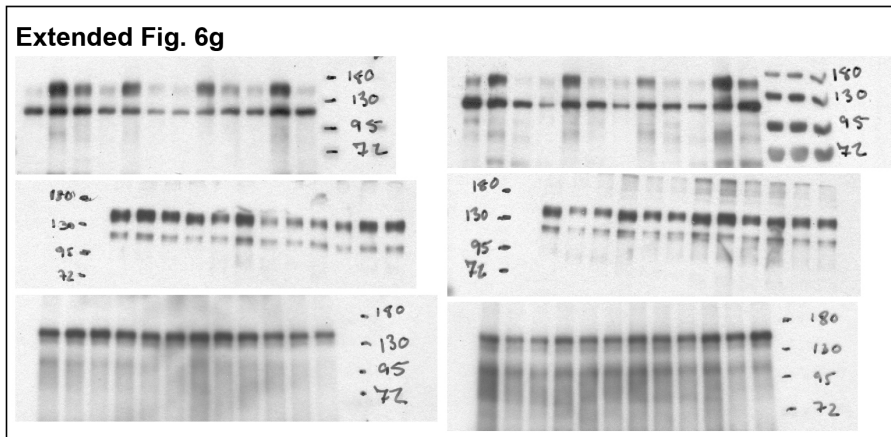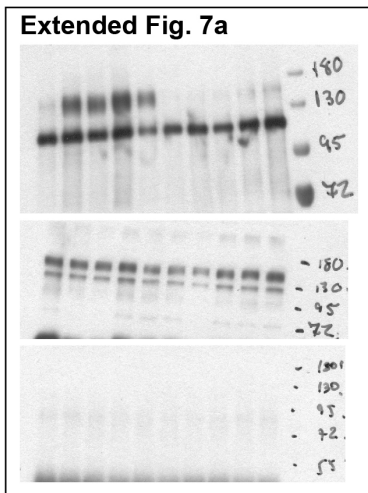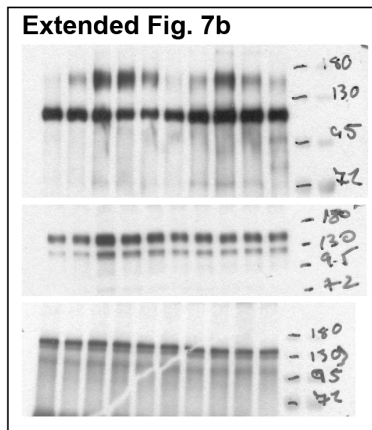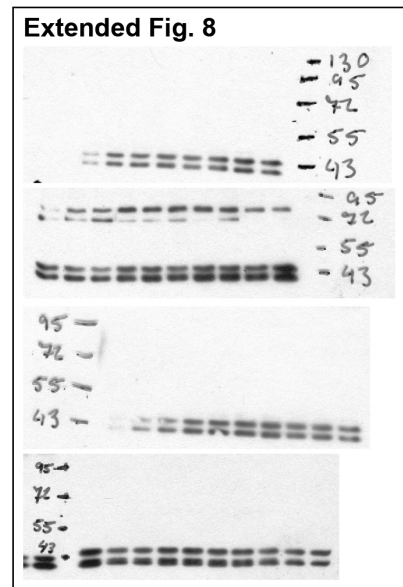

Supplementary Figure 1. | Raw images of immunoblots
